# Supplementary material
Source: publisher figshare collection journal article supplement (https://aacr.figshare.com/articles/dataset/_/22488867)
Supplement: Supplementary file 1 [file 39940485]

Supplementary Figure 1

1

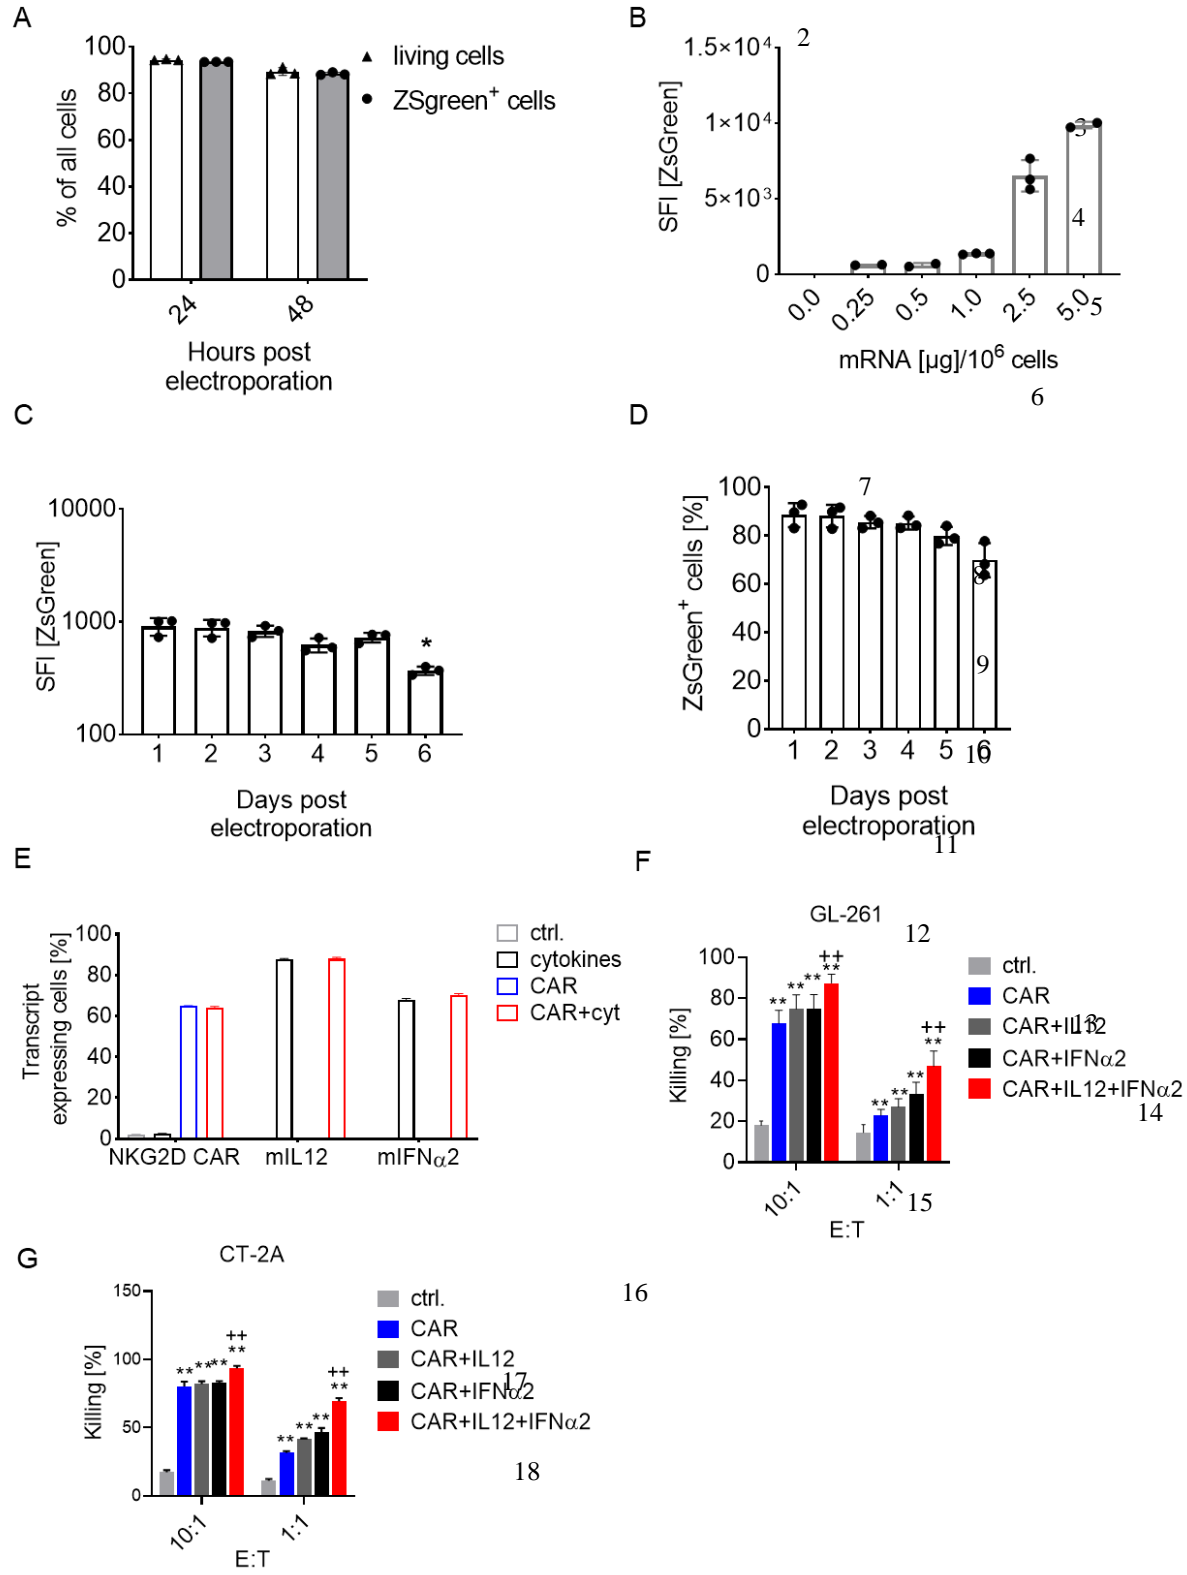

19

20

21

22  
23  
24  
25  
26  
27  
28  
29  
30  
31  
32  
33  
34  
35  
36  
37  
38  
39  
40  
41  
42  
43  
44  
45

**Supplementary Figure 1. Electroporation of murine T cells for mRNA transfection and cytolytic activity of multifunctional CAR T cells.** **A.** Murine T cells were electroporated with 2.5  $\mu$ g mRNA encoding for ZSgreen at a voltage of 1600 mV applied in 3 pulses of 10 ms pulse width. The percentage of living cells and ZSgreen positive cells of all cells was determined by flow cytometry 24 h or 48 h after electroporation. **B.** Electroporation setup as in A, but increasing concentrations of mRNA were transfected and fluorescence intensity was detected 24 h later by flow cytometry. **C and D.** Electroporation as in A, but fluorescence intensity or percentage of fluorescent cells was determined for up to 6 days after electroporation by flow cytometry. **E.** Murine T cells were mock-electroporated with the parameter indicated in A or with mRNAs encoding either for the NKG2D CAR, or mIL12 and mIFN $\alpha$ 2 or all three proteins. Transgene expression at 24 h was determined by flow cytometry. Data are presented as mean  $\pm$  SD (\* p < 0.05; compared to day 1 after electroporation). **F and G.** Murine T cells were mock electroporated (ctrl.), or with mRNAs encoding for either the NKG2D CAR (CAR), or the NKG2D CAR and mIL12 or mIFN $\alpha$ 2 (CAR + IL12 and CAR + IFN $\alpha$ 2), or all three mRNAs (CAR + IL12 + IFN $\alpha$ 2). Subsequently, they were used as effector cells in co-culture with GL-261 (F) or CT-2A (G) glioma cells at the indicated effector:target ratios.
